# Supplementary material for: Rugby ball-shaped magnetic microcapsule for tumor hyperthermia
Source: Royal Society of Chemistry journal article supplement (doi:10.1039/d3ra01294h), 2023-01-01
Supplement: d3ra01294h1.pdf [file d3ra01294h1.pdf]

## **Rugby ball-shaped magnetic microcapsule for tumor hyperthermia**

Siyao Wang,<sup>a</sup> Nana Wen,<sup>a</sup> Bin Yan,<sup>a</sup> Xuan Wang,<sup>a</sup> Zhiye Cai,<sup>a</sup> Yao Li,<sup>b\*</sup> Xiaoli Liu<sup>a,c\*</sup>

<sup>a</sup> Laboratory of Resource Biology and Biotechnology in Western China, Ministry of Education; Provincial Key Laboratory of Biotechnology of Shaanxi Province, Northwest University, Xi'an, Shaanxi 710069, China

<sup>b</sup> Institute of Smart Biomedical Materials, School of Materials Science and Engineering, Zhejiang Sci-Tech University, Hangzhou 310018, China

<sup>c</sup> Institute of Regenerative and Reconstructive Medicine, Med-X Institute, First Affiliated Hospital of Xi'an Jiaotong University, Xi'an, Shaanxi 710049, China; National Local Joint Engineering Research Center for Precision Surgery & Regenerative Medicine, Shaanxi Provincial Center for Regenerative Medicine and Surgical Engineering, First Affiliated Hospital of Xi'an Jiaotong University, Xi'an, Shaanxi 710061, China

## Materials

Ferric chloride hexahydrate (>99.0%), oleic acid, ammonium dihydrogen phosphate, sodium chloride and N,N-dimethylformamide were supplied by Sigma-Aldrich (MO, USA). All reagents were of analytical grade and used as received from the suppliers without further purification.

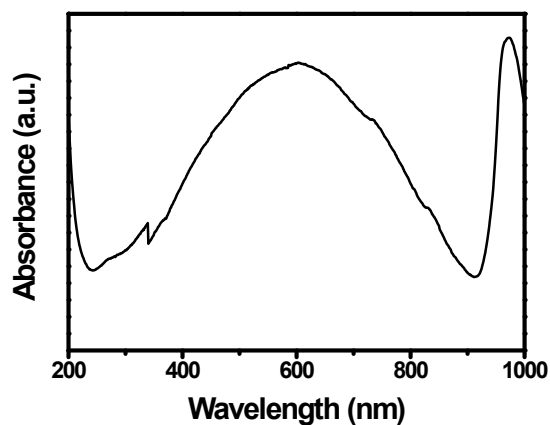

Figure S1. UV absorption spectra of superparamagnetic iron oxide.

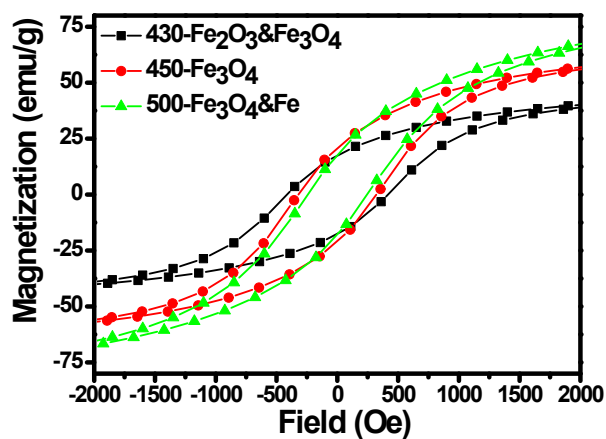

Figure S2. Hysteresis loop of the microcapsules at 300 K after the reduction with different temperatures (430°C, 450°C and 500°C).

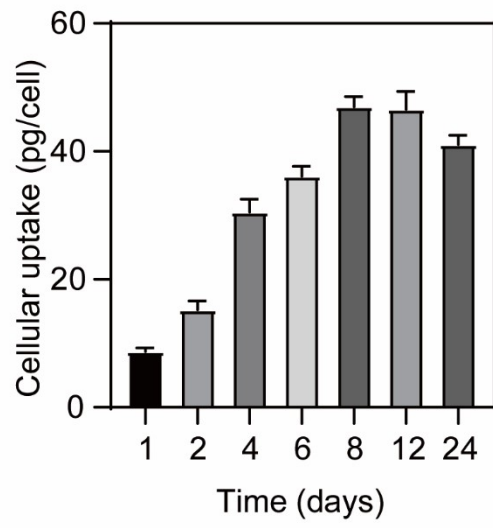

**Figure S3.** Quantitative study of cellular uptake efficiency of magnetic microcapsules after 1 h, 2 h, 4 h, 6 h, 8 h, 12 h, 24 h incubation, respectively.
